# Supplementary material
Source: PubMed Central journal article supplement (PMC5868273)

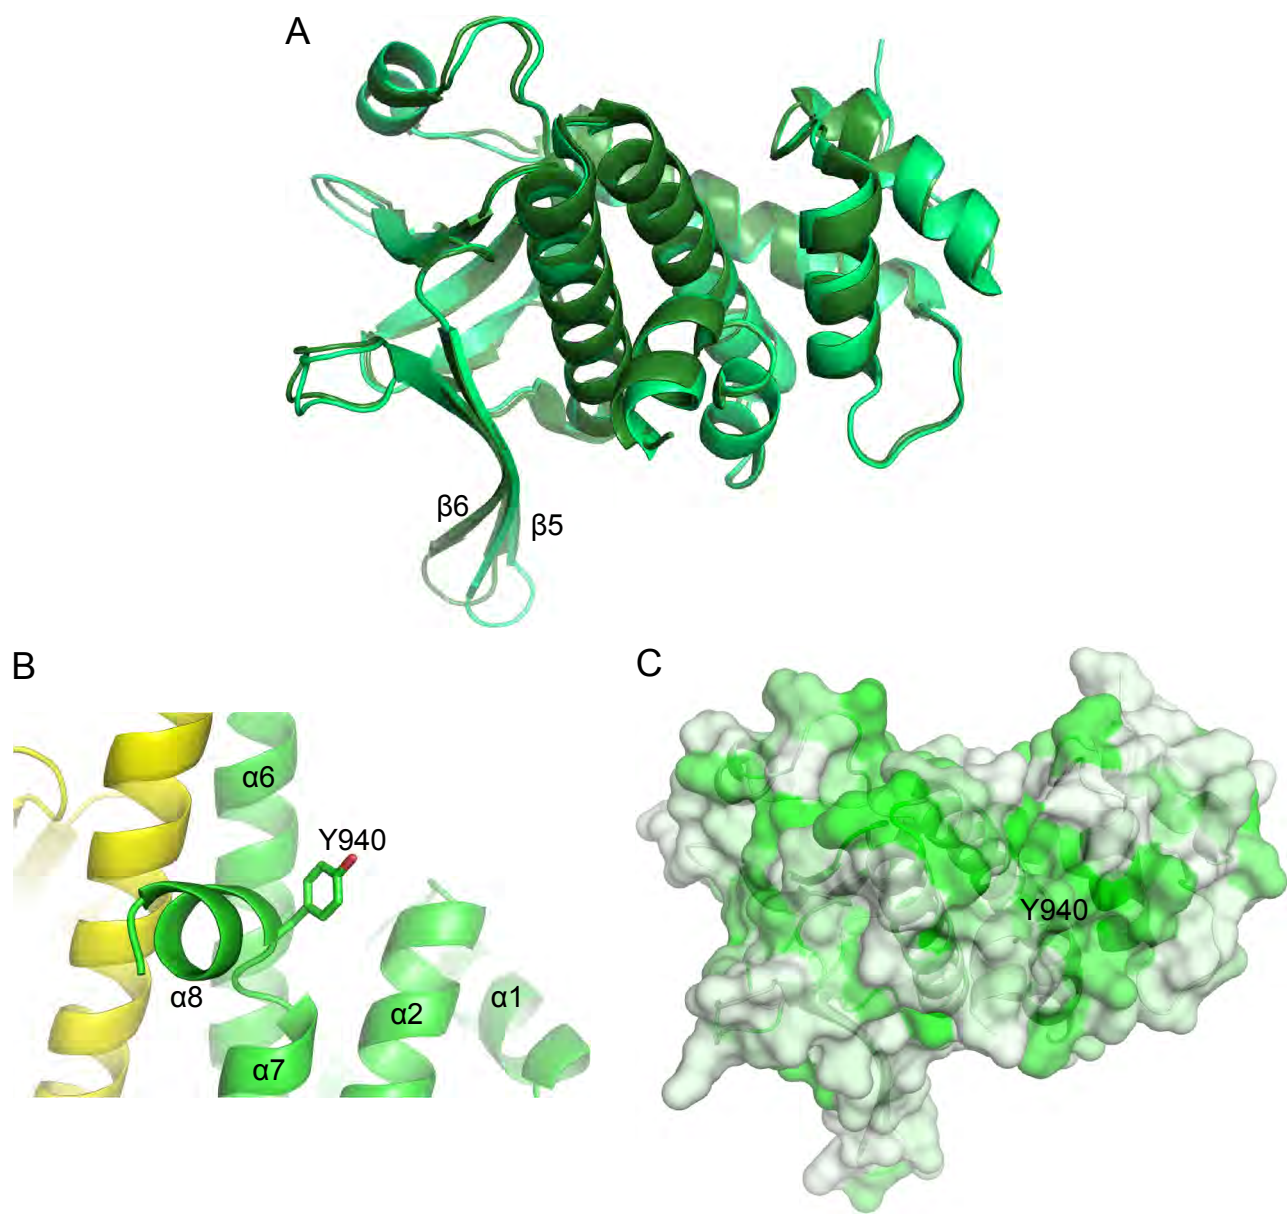

Supplemental Figure 1

Supplement: supp_RA117.001446_134657_1_supp_50990_p2tj20.pdf [file supp_RA117.001446_134657_1_supp_50990_p2tj20.pdf]

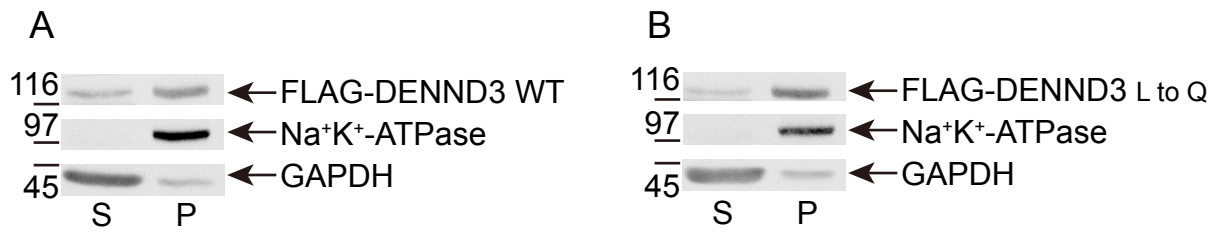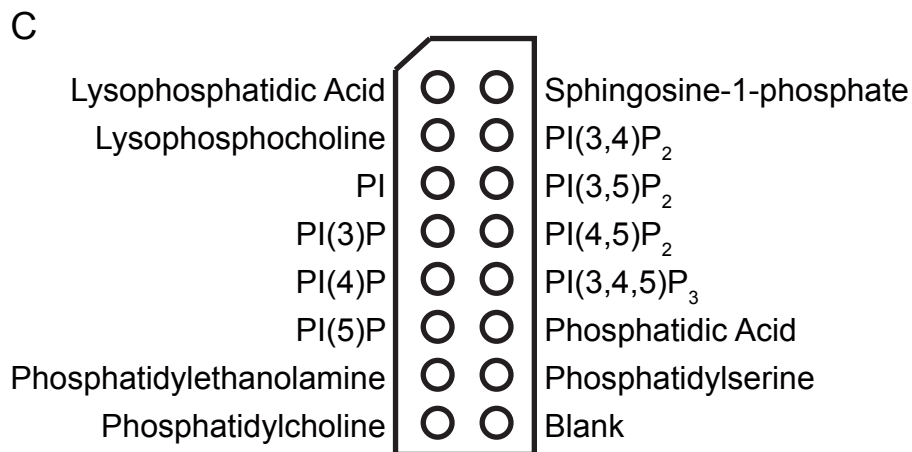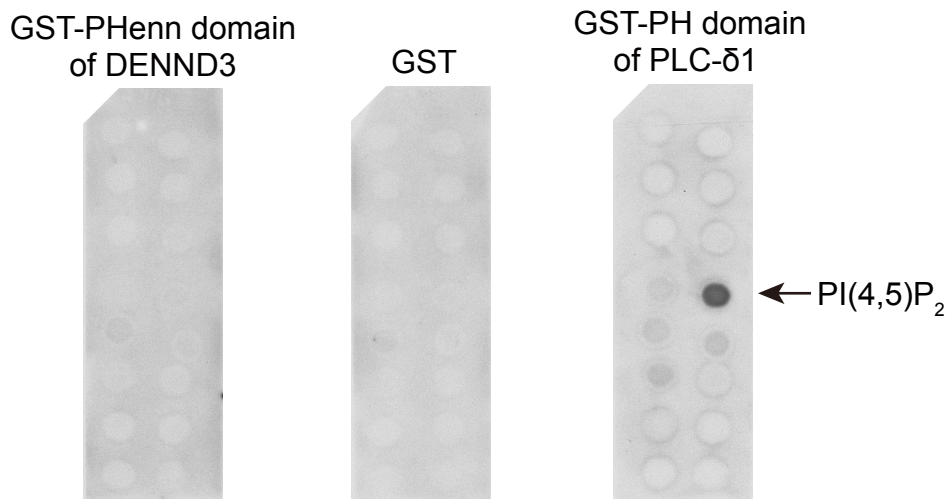

Supplemental Figure 2

Supplement: supp_RA117.001446_134657_1_supp_50991_p2tj2d.pdf [file supp_RA117.001446_134657_1_supp_50991_p2tj2d.pdf]

sorting nexin-17  
PDB 4tkn

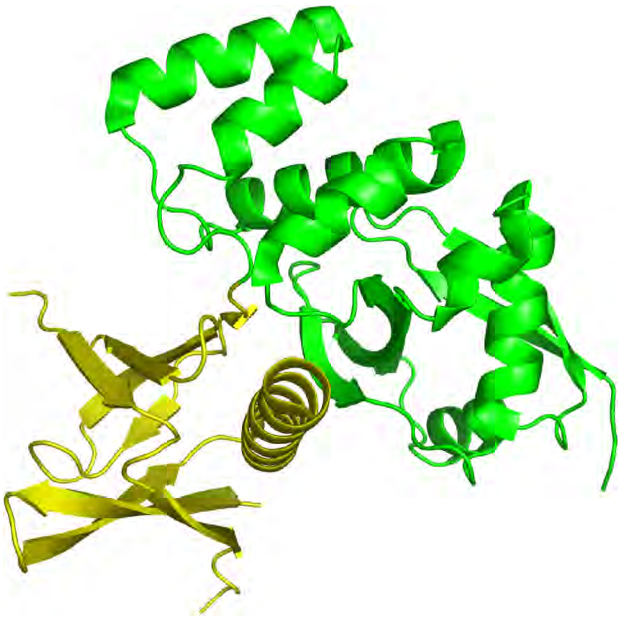

focal adhesion kinase 1  
PDB 2aeh

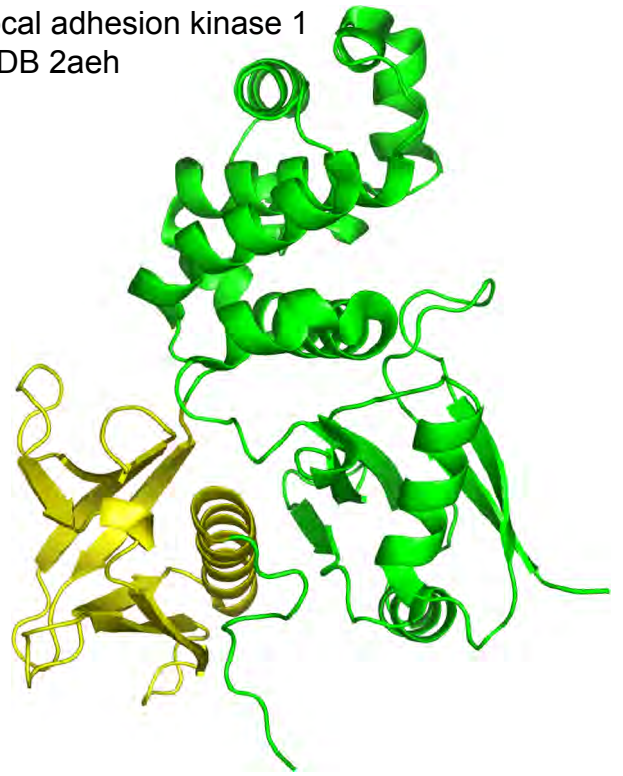

Supplemental Figure 3

Supplement: supp_RA117.001446_134657_1_supp_50992_p2tj2p.pdf [file supp_RA117.001446_134657_1_supp_50992_p2tj2p.pdf]
